# Supplementary material
Source: MDPI journal article supplement (https://www.mdpi.com/2571-631X/5/2/14)
Supplement: s1 [file s1]

# Workflow for the arterial diameter computation and maximum blood velocity extraction

Christophe Noël<sup>1\*</sup>

## Abstract

We detailed the procedure for the arterial diameter computation and maximum blood velocity extraction from DICOM<sup>®</sup> files. These files resulted from measurements carried out with an ultra-high ultrasound scanner (Vevo MD, Fujifilm VisualSonics) on proper volar digital arteries. Firstly, we implemented a DICOM<sup>®</sup> to MAT (Matlab<sup>®</sup> storage file) translator. Secondly, we defined a five-stage procedure to compute the artery diameter by using Otsu's image segmentation technique and a Euclidean distance transform. Finally, the maximum blood velocity was captured using an RGB to HSV colour space convertor.

## Keywords

DICOM<sup>®</sup> format – despeckling filter – segmentation algorithm – Otsu's method – proper volar artery.

<sup>1</sup>Electromagnetism, Vibration, Optics laboratory, French National Research and Safety Institute for the Prevention of Occupational Accidents and Diseases (INRS), Vandœuvre-lès-Nancy, France

\*Corresponding author: Christophe Noël, Institut national de recherche et de sécurité (INRS), 1 rue du Morvan, CS 60027 - F-54519 Vandœuvre cedex, France; Email, christophe.noel@inrs.fr; Phone, +33 383 50 21 12

## Contents

|   |                                         |   |
|---|-----------------------------------------|---|
| 1 | Postprocessing DICOM <sup>®</sup> files | 1 |
| 2 | Arterial diameter computation           | 1 |
| 3 | Maximum blood velocity extraction       | 2 |
|   | Acknowledgments                         | 3 |
|   | References                              | 3 |

## 1. Postprocessing DICOM<sup>®</sup> files

Firstly, the B-mode images and blood velocities measured by Pulsed Wave Doppler (figure 1, **B-mode cineloop** and **Pulsed Wave Doppler of the proper volar digital artery**) were recorded in DICOM<sup>®</sup> (Digital Imaging and Communications in Medicine) format [1].

Secondly, these DICOM<sup>®</sup> files were processed by Matlab<sup>®</sup> (The MathWorks, Natick, MA, USA) to extract, among the full ultrasound data, only information needed for the next computing step (e.g., the number of frames, the physical units, the physical value increments per positive pixel increment, etc.). Our DICOM<sup>®</sup> to MAT (i.e. Matlab<sup>®</sup> storage file) translator dramatically reduced the size of the initial raw DICOM<sup>®</sup> files. This was necessary owing the large number of tests to be performed. Hence without such a procedure, all these measurements would have generated a huge amount of digital data rather complicated to manage.

## 2. Arterial diameter computation

Starting from the MAT files stored previously, we implemented five stages in Matlab<sup>®</sup> to assess the artery diameter of

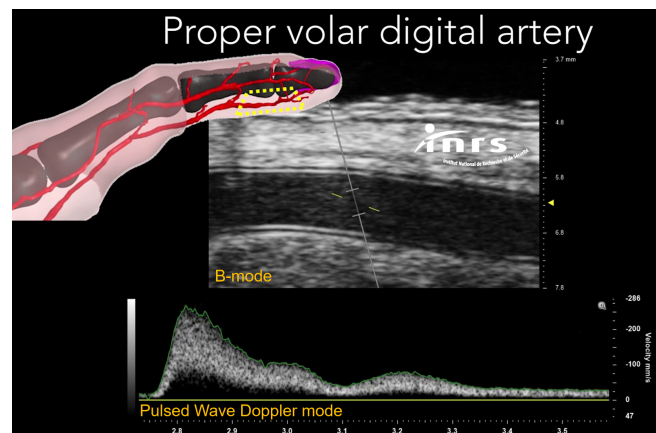

**Figure S1.** B-mode image and velocity measured by pulsed wave Doppler mode for a 21-year-old male volunteer.

the proper volar digital artery (figure 2).

In the first stage and for the first frame of the cineloop, the experimenter picked out the region of interest (ROI) where the artery diameter had to be computed. Afterwards, a despeckling filter was applied to reduce the ultrasound speckle noise and so foster the next computation steps. Ten filters (table 1) proposed by Loizou and co-authors [2, 3] were taken into account in the second stage. This denoised ROI image was then segmented in the third step. A number of computational approaches were determined for image processing field to address the issue of image segmentation [4, 5, 6, 7, 8, 9]. In this study, we applied Otsu's segmentation method which proved its relevance and accuracy regarding ultrasound im-

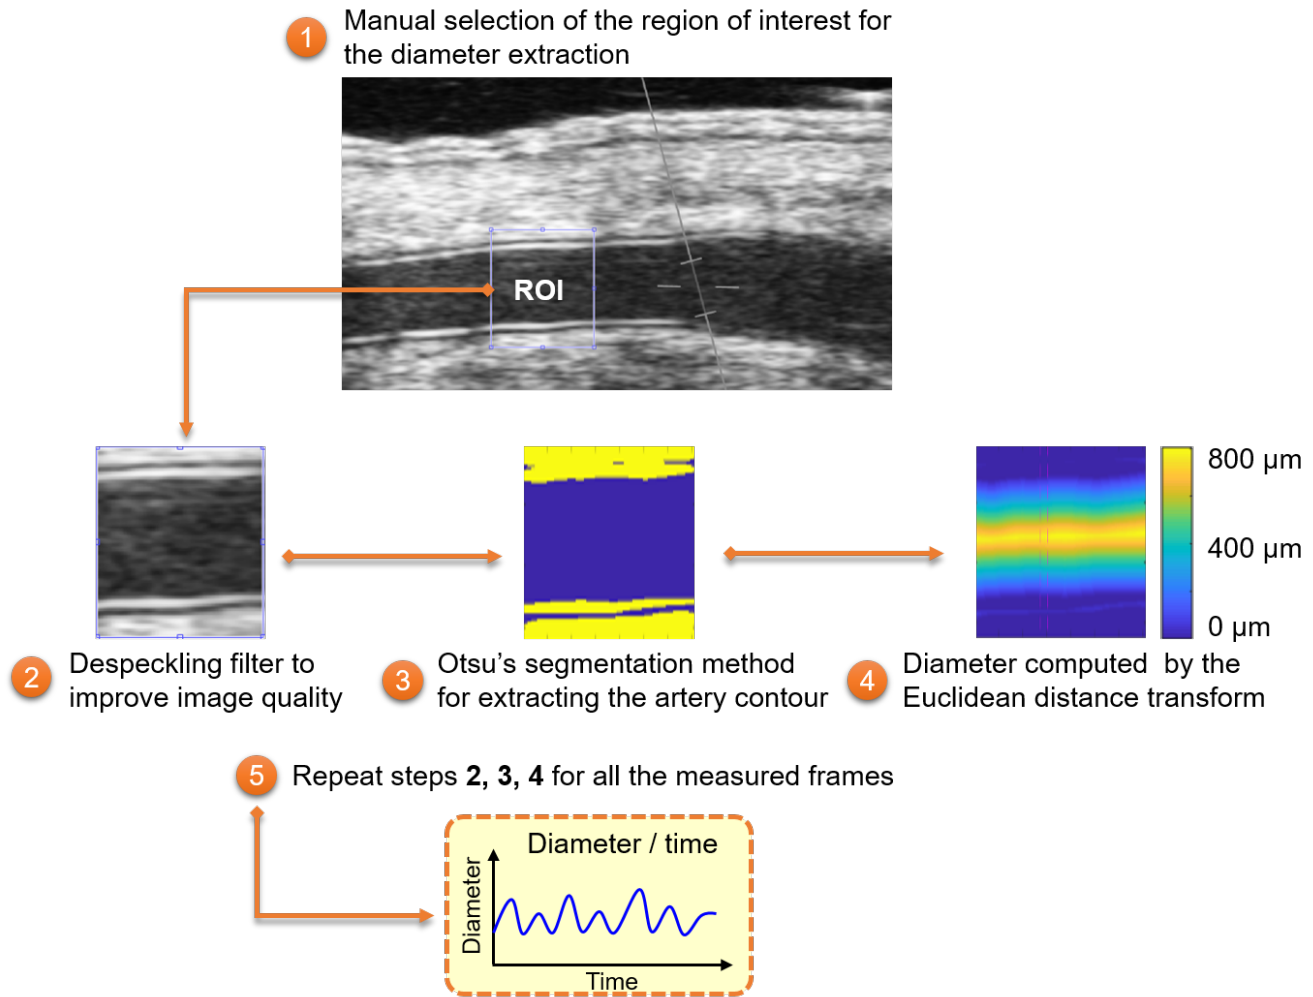

**Figure S2.** Synoptic chart of the procedure for the artery diameter assessment.

ages [10]. This method had already been implemented in the `imbinarize` function from the Matlab® Image Processing Toolbox. The binary image resulting from that segmentation procedure was subsequently used to work out the artery diameter in the fourth stage. To this end, we computed the Euclidean distance transform of the previous binary image by applying the `bwdist` function from the Matlab® Image Processing Toolbox. For each pixel in the binary image, the Euclidean distance transform assigned a number that is the distance between that pixel and the nearest nonzero pixel of the binary image. Afterwards, the mean artery diameter in ROI resulted in averaging the maximal values of the Euclidean distance transform. Instead of computing the mean diameter for the whole ROI, the experimenter could also pick out a sub-part of the ROI by placing (figure 2 stage 4) two segments on the image to delimit the desired sub-area. This sub-area could also be only an artery slice. Further information about using the Euclidean distance transform in artery diameter computing with Matlab® may be found here: [Help in measuring vessel diameter](#) and [How to calculate the diameter of a vessel](#).

Finally, steps 2,3 and 4 were repeated for all the frames of the recorder cineloop. Hence, the mean diameter of the whole ROI or selected sub-area was evaluated as exemplified in figure 3. The systolic diastolic-pulsatile cardiac cycle resulted in oscillating the artery diameter roughly between 775 to 790  $\mu\text{m}$  for this particular volunteer.

### 3. Maximum blood velocity extraction

The pulsed wave Doppler mode of our ultrasound scanner (Vevo MD, Fujifilm VisualSonics) may provide the blood flow velocities in the ultrasound probe steering direction and enables drawing the maximum blood velocity in this measuring section in green (the colour can also be orange depending of the software update). The DICOM® files recorded were processed by converting the raw pulsed wave Doppler images from the classical RGB to HSV (Hue, Saturation, Value) colour system. Indeed, in the HSV colour space the hue (or the colour) of each pixel was easily distinguishable by examining the first channel of the matrix representation of the image.

**Table S1.** Despeckling filters [2] used in step 2 of the procedure for computing the artery diameter.

| Type           | General name                                          | Algorithm name |
|----------------|-------------------------------------------------------|----------------|
| Linear         | First-Order Statistics Filtering                      | DsFlsmv        |
|                | First-Order Statistics Filtering                      | DsFwiener      |
|                | Homogeneous Mask Area Filtering                       | DsFlsmisc      |
| Non-Linear     | Median Filtering                                      | DsFmedian      |
|                | Linear Scaling Filter                                 | DsFls          |
|                | Linear Scaling Filter                                 | DsFlecasort    |
|                | Maximum Homogeneity Over Pixel Neighborhood Filtering | DsFhomog       |
|                | Geometric Filtering                                   | DsFgf4d        |
|                | Homomorphic Filtering                                 | DsFhomo        |
| Image analysis | Wavelet filtering                                     | DsFwaveltc     |

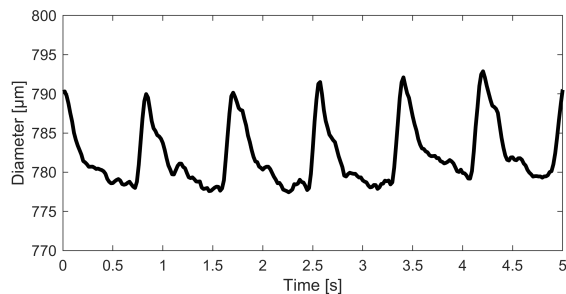

**Figure S3.** Diameter as a function of time computed from an ultrasound B-mode cineloop recorded on the proper volar artery of a 39-year-old male volunteer.

More details of this method are available here: [Matlab - How to detect green color on an image?](#) The procedure was then iterated among the full frames of the cineloop. Information on physical units and pixel scales provided by the DICOM® files were then used to format the data. The blood velocity capture algorithm was included in the DICOM® to MAT translator described in section 1.

## Acknowledgments

The author is grateful to Mr Philippe Davault from the Fujifilm VisualSonics company for his help in accessing the raw setup of the ultrasound scanner.

## References

- [1] ISO 12052:2017. Health informatics — digital imaging and communication in medicine (dicom) including

workflow and data management. Standard, International Organization for Standardization, Geneva, CH, 2017.

- [2] Christos P. Loizou, Charoula Theofanous, Marios Pantziaris, and Takis Kasparis. Despeckle filtering software toolbox for ultrasound imaging of the common carotid artery. *Computer Methods and Programs in Biomedicine*, 114(1):109–124, apr 2014.
- [3] Christos P. Loizou and Constantinos S. Pattichis. Despeckle filtering for ultrasound imaging and video, volume i: Algorithms and software, second edition. *Synthesis Lectures on Algorithms and Software in Engineering*, 7(1):1–180, 2015.
- [4] J. A. Noble and D. Boukerroui. Ultrasound image segmentation: a survey. *IEEE Transactions on Medical Imaging*, 25(8):987–1010, 2006.
- [5] George D. Giannoglou, Yiannis S. Chatzizisis, Vasilis Koutkias, Ioannis Kompatsiaris, Maria Papadogiorgaki, Vasileios Mezaris, Eirini Parissi, Panagiotis Diamantopoulos, Michael G. Strintzis, Nicos Maglaveras, George E. Parcharidis, and George E. Louridas. A novel active contour model for fully automated segmentation of intravascular ultrasound images: In vivo validation in human coronary arteries. *Computers in Biology and Medicine*, 37(9):1292–1302, 2007.
- [6] Daniel J Withey and Zoltan J Koles. A Review of Medical Image Segmentation: Methods and Available Software. *International Journal of Bioelectromagnetism*, 10(3):125–148, 2008.
- [7] Nasrul Humaimi Mahmood and Eko Supriyanto. Automatic Detection of Carotid Artery in Ultrasound Image using Tresholding Method. *International Journal of Scientific & Engineering Research*, 2(12):1–7, 2011.
- [8] Filippo Molinari, Constantinos S. Pattichis, Guang Zeng, Luca Saba, U. Rajendra Acharya, Roberto Sanfilippo, Andrew Nicolaides, and Jasjit S. Suri. Completely automated multiresolution edge snapper-A new technique for an accurate carotid ultrasound IMT measurement: Clinical validation and benchmarking on a multi-institutional database. *IEEE Transactions on Image Processing*, 21(3):1211–1222, 2012.
- [9] Filippo Molinari, Kristen M. Meiburger, Guang Zeng, U. Rajendra Acharya, William Liboni, Andrew Nicolaides, and Jasjit S. Suri. Carotid artery recognition system: A comparison of three automated paradigms for ultrasound images. *Medical Physics*, 39(1):378–391, 2012.
- [10] P. Krishna Kumar, Tadashi Araki, Jeny Rajan, John R. Laird, Andrew Nicolaides, and Jasjit S. Suri. State-of-the-art review on automated lumen and adventitial border delineation and its measurements in carotid ultrasound. *Computer Methods and Programs in Biomedicine*, 163:155–168, 2018.
